# Supplementary material
Source: PubMed Central journal article supplement (PMC5927977)
Supplement: 2018_190876-Disclosures_and_Contributions.pdf [file 2018_190876-Disclosures_and_Contributions.pdf]

Haematologica  
HAEMATOL/2018/190876  
Version 2  
Hematopoietic stem cell mobilization with plerixafor in sickle cell  
disease

Matthew Hsieh and John Tisdale

Disclosures: Nothing to disclose

Contributions: Both authors equally contributed.
